# Supplementary material for: Effects of perineuronal nets on neural firing properties
Source: Research Square preprint supplement (doi:10.21203/rs.3.rs-2198467/v1), 2022-11-05
Supplement: Supplementary file 1 [file 6d8d50ca664e5ce12dae03c8.pdf]

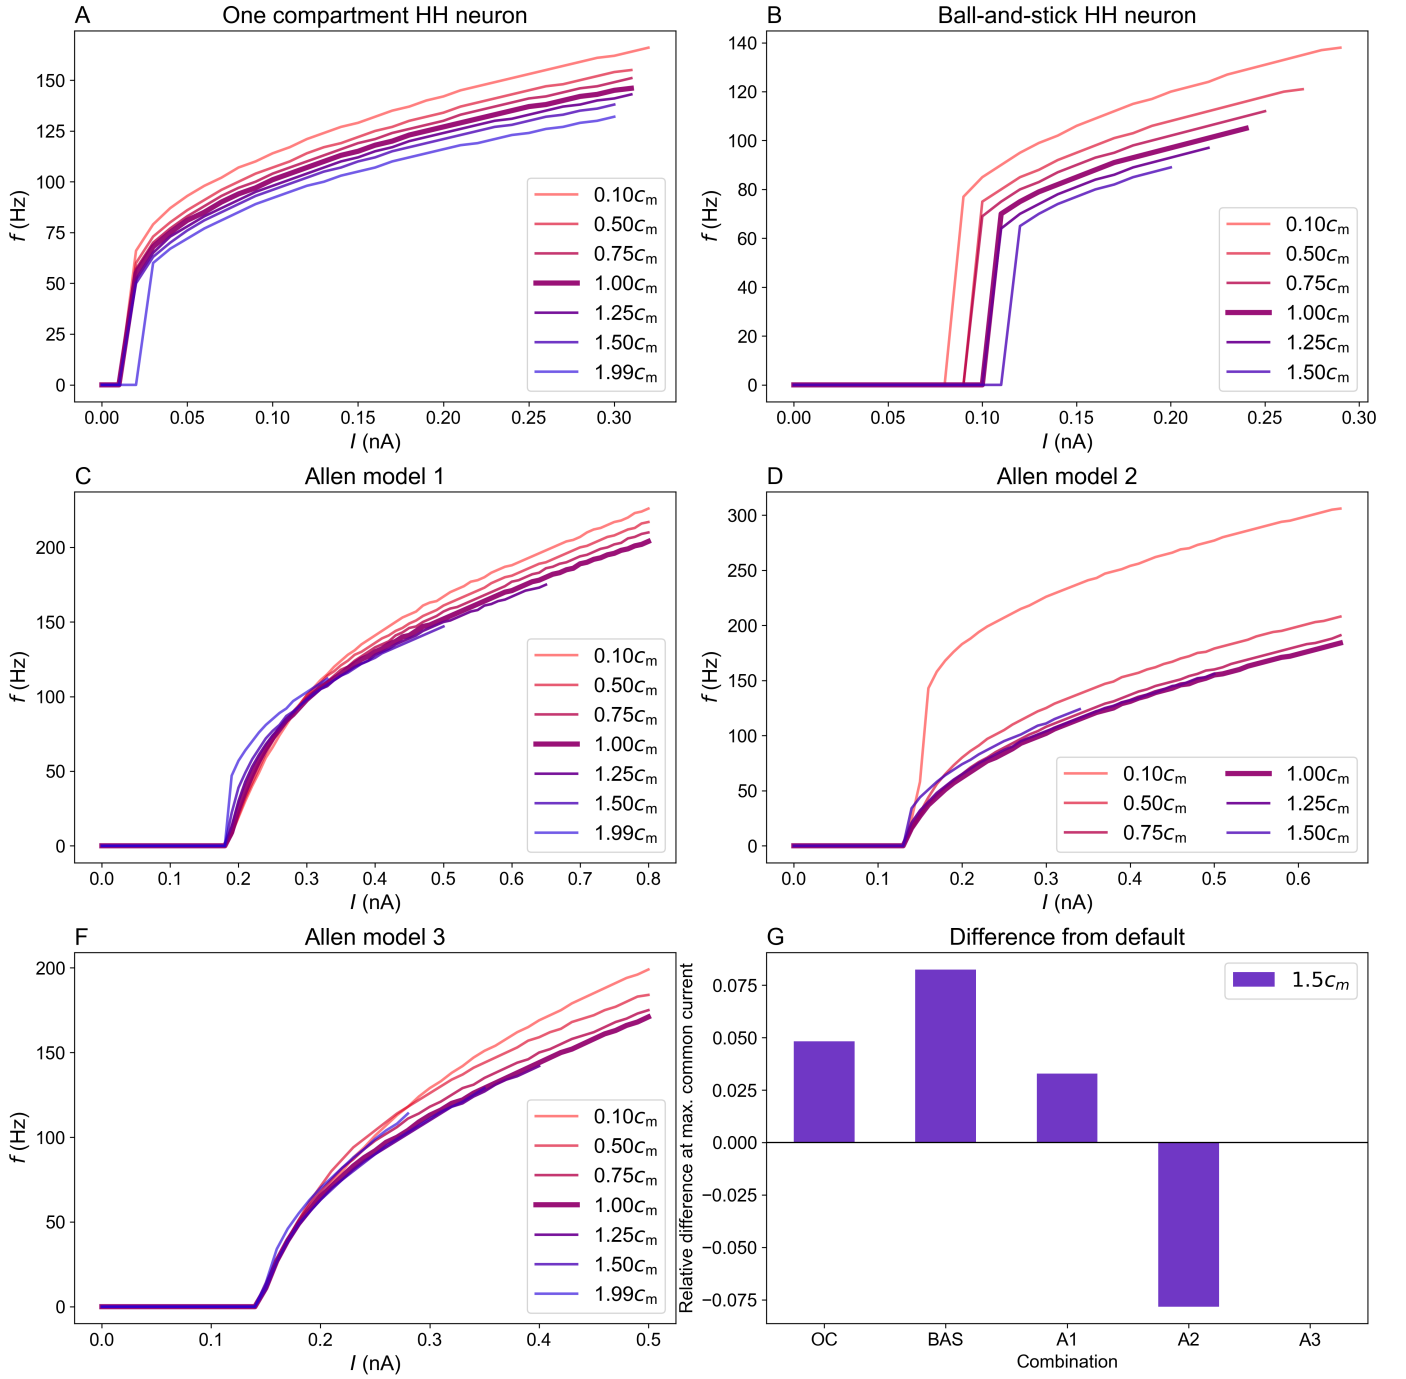

Supplementary Figure 1: Frequency-input curves for selected values of  $c_m$  for the various models.  $c_m$  is altered everywhere. A) The one-compartment Hodgkin-Huxley model, B) The ball-and-stick Hodgkin-Huxley model, C) Allen model 1, D) Allen model 2, E) Allen model 3, G) The relative difference between 1.0  $c_m$  and 1.5  $c_m$  at the largest current these curves have in common
